# Supplementary material for: Comparison of Symptoms Associated With SARS-CoV-2 Variants Among Children in Canada
Source: PubMed Central journal article supplement (PMC9999248; doi:10.1001/jamanetworkopen.2023.2328), 2023-03-09

## Supplementary Online Content

Sumner MW, Xie J, Zemek R, et al; Pediatric Emergency Research Canada (PERC) COVID Study Group. Comparison of symptoms associated with SARS-CoV-2 variants among children in Canada. *JAMA Netw Open*. 2023;6(3):e232328. doi:10.1001/jamanetworkopen.2023.2328

**eTable 1.** Results of Mixed-Effect Binary Logistic Regression Model, Examining the Odds of Experiencing a Given Symptom or Symptom Group by Variant of Concern

**eTable 2.** Comparison of Symptom Profiles by Method of Variant of Concern Assignment (Reported vs Imputed)

**eTable 3.** Comparison of Clinical Course and Outcomes at Index ED Visit or Within 14-Day Follow-up Period, by Method of Variant of Concern Assignment (Reported vs Imputed)

**eFigure.** Chronological Depiction of Timing of Identification of Variants and Proportional Breakdown of Identification Through Testing or Imputation Based on Known Dominant Strains

This supplementary material has been provided by the authors to give readers additional information about their work.

**eTable 1.** Results of Mixed-Effect Binary Logistic Regression Model, Examining the Odds of Experiencing a Given Symptom or Symptom Group by Variant of Concern

|                                   | Variant of Concern (VoC)        |                                 |                                |               | Sex                             |      | Age                                |                                  |        | Illness Duration                 |                                  |        | Hospitalized                     |      |
|-----------------------------------|---------------------------------|---------------------------------|--------------------------------|---------------|---------------------------------|------|------------------------------------|----------------------------------|--------|----------------------------------|----------------------------------|--------|----------------------------------|------|
|                                   | Omicron                         | Delta                           | Alpha                          | Original type | Female                          | Male | ≥ 4 yrs                            | 1-3 yrs                          | < 1 yr | ≥ 4 days                         | 2-3 days                         | ≤1 day | Yes                              | No   |
| <b>Core Symptom</b>               | 2.19<br>(1.37, 3.51)<br>P=0.001 | 2.09<br>(1.25, 3.49)<br>P=0.005 | 0.69<br>(0.43, 1.08)<br>P=0.11 | ref.          | 1.18<br>(0.83, 1.67)<br>P=0.35  | ref. | 0.45<br>(0.30, 0.68)<br>P<0.001    | 1.03<br>(0.63, 1.69)<br>P=0.89   | ref.   | 1.24<br>(0.81, 1.88)<br>P = 0.32 | 1.34<br>(0.87, 2.07)<br>P = 0.18 | ref.   | 0.57<br>(0.36, 0.93)<br>P = 0.08 | ref. |
| <b>Fever</b>                      | 2.00<br>(1.43, 2.80)<br>P<0.001 | 1.93<br>(1.33, 2.78)<br>P<0.001 | 0.76<br>(0.53, 1.09)<br>P=0.14 | ref.          | 1.22<br>(0.95, 1.57)<br>P=0.12  | ref. | 0.59<br>(0.44, 0.79)<br>P<0.001    | 1.23<br>(0.88, 1.73)<br>P=0.22   | ref.   | 0.85<br>(0.63, 1.16)<br>P=0.31   | 1.19<br>(0.86, 1.63)<br>P=0.29   | ref.   | 0.74<br>(0.51, 1.08)<br>P=0.12   | ref. |
| <b>Cough</b>                      | 1.42<br>(1.06, 1.91)<br>P=0.02  | 1.57<br>(1.13, 2.17)<br>P=0.007 | 1.13<br>(0.80, 1.58)<br>P=0.48 | ref.          | 0.88<br>(0.71, 1.10)<br>P=0.26  | ref. | 0.57<br>(0.44, 0.74)<br>P<0.001    | 0.88<br>(0.66, 1.16)<br>P=0.36   | ref.   | 2.56<br>(1.93, 3.38)<br>P<0.001  | 1.54<br>(1.17, 2.02)<br>P=0.002  | ref.   | 0.67<br>(0.47, 0.94)<br>P=0.02   | ref. |
| <b>Conjunctivitis</b>             | 0.41<br>(0.22, 0.78)<br>P=0.007 | 1.32<br>(0.75, 2.33)<br>P=0.33  | 0.40<br>(0.17, 0.95)<br>P=0.04 | ref.          | 0.70<br>(0.44, 1.11)<br>P=0.13  | ref. | 0.70<br>(0.42, 1.16)<br>P=0.16     | 0.47<br>(0.25, 0.85)<br>P=0.01   | ref.   | 1.43<br>(0.80, 2.58)<br>P=0.23   | 2.07<br>(1.18, 3.65)<br>P=0.01   | ref.   | 1.19<br>(0.60, 2.38)<br>P=0.61   | ref. |
| <b>Upper Respiratory Symptoms</b> | 1.32<br>(0.97, 1.80)<br>P=0.07  | 1.96<br>(1.38, 2.79)<br>P<0.001 | 0.72<br>(0.51, 1.02)<br>P=0.07 | ref.          | 1.06<br>(0.84, 1.33)<br>P=0.62  | ref. | 0.65<br>(0.49, 0.85)<br>P=0.002    | 0.84<br>(0.62, 1.12)<br>P=0.24   | ref.   | 2.50<br>(1.88, 3.34)<br>P<0.001  | 2.04<br>(1.53, 2.70)<br>P<0.001  | ref.   | 0.62<br>(0.43, 0.88)<br>P=0.008  | ref. |
| <b>Lower Respiratory Symptoms</b> | 1.42<br>(1.04, 1.92)<br>P=0.03  | 0.96<br>(0.69, 1.36)<br>P=0.83  | 1.05<br>(0.74, 1.50)<br>P=0.77 | ref.          | 0.89<br>(0.71, 1.12)<br>P=0.31  | ref. | 0.94<br>(0.72, 1.24)<br>P=0.68     | 0.98<br>(0.73, 1.31)<br>P=0.88   | ref.   | 1.83<br>(1.38, 2.42)<br>P<0.001  | 1.48<br>(1.12, 1.97)<br>P=0.007  | ref.   | 0.96<br>(0.66, 1.40)<br>P=0.85   | ref. |
| <b>GI</b>                         | 0.89<br>(0.65, 1.21)<br>P=0.45  | 0.80<br>(0.57, 1.13)<br>P=0.21  | 0.84<br>(0.59, 1.20)<br>P=0.34 | ref.          | 1.37<br>(1.09, 1.72)<br>P=0.007 | ref. | 1.54<br>(1.18, 2.02)<br>P=0.002    | 1.57<br>(1.18, 2.09)<br>P=0.002  | ref.   | 1.79<br>(1.35, 2.37)<br>P<0.001  | 1.77<br>(1.34, 2.35)<br>P<0.001  | ref.   | 1.54<br>(1.07, 2.23)<br>P=0.008  | ref. |
| <b>Neurologic</b>                 | 1.12<br>(0.76, 1.65)<br>P=0.57  | 1.18<br>(0.79, 1.77)<br>P=0.41  | 0.91<br>(0.59, 1.40)<br>P=0.66 | ref.          | 1.39<br>(1.05, 1.85)<br>P=0.02  | ref. | 33.65<br>(19.69, 57.49)<br>P<0.001 | 6.09<br>(3.46, 10.73)<br>P<0.001 | ref.   | 1.50<br>(1.06, 2.14)<br>P=0.02   | 1.26<br>(0.88, 1.82)<br>P=0.21   | ref.   | 1.09<br>(0.68, 1.73)<br>P=0.91   | ref. |
| <b>MSK</b>                        | 0.56<br>(0.36, 0.87)<br>P=0.009 | 0.65<br>(0.42, 1.02)<br>P=0.06  | 0.56<br>(0.34, 0.90)<br>P=0.02 | ref.          | 1.59<br>(1.16, 2.18)<br>P=0.004 | ref. | 12.87<br>(7.55, 21.94)<br>P<0.001  | 3.77<br>(2.12, 6.72)<br>P<0.001  | ref.   | 1.69<br>(1.14, 2.51)<br>P=0.01   | 1.59<br>(1.06, 2.39)<br>P=0.02   | ref.   | 0.68<br>(0.38, 1.21)<br>P=0.19   | ref. |
| <b>Rash, oral</b>                 | 0.63<br>(0.44, 0.91)            | 0.77<br>(0.51, 1.14)            | 0.65<br>(0.42, 0.98)           | ref.          | 1.09<br>(0.83, 1.43)            | ref. | 0.84<br>(0.61, 1.16)               | 0.65<br>(0.46, 0.92)             | ref.   | 1.69<br>(1.21, 2.35)             | 1.18<br>(0.84, 1.67)             | ref.   | 0.93<br>(0.59, 1.46)             | ref. |

| changes,        | P=0.01               | P=0.19               | P=0.04                |  | P=0.54               |  | P=0.30                 | P=0.01                 |  | P=0.002              | P=0.34               |  | P=0.75               |
|-----------------|----------------------|----------------------|-----------------------|--|----------------------|--|------------------------|------------------------|--|----------------------|----------------------|--|----------------------|
| GU/dehydration  | 1.28<br>(0.93, 1.76) | 1.08<br>(0.76, 1.54) | 1.21<br>(0.84, 1.74)  |  | 1.34<br>(1.06, 1.70) |  | 0.72<br>(0.54, 0.95)   | 1.03<br>(0.76, 1.38)   |  | 1.42<br>(1.06, 1.91) | 1.50<br>(1.12, 2.01) |  | 1.76<br>(1.20, 2.57) |
|                 | P=0.14               | P=0.67               | P=0.31                |  | P=0.01               |  | P=0.02                 | P=0.86                 |  | P=0.02               | P=0.007              |  | P=0.004              |
| Systemic        | 1.77<br>(1.24, 2.52) | 1.19<br>(0.82, 1.72) | 0.70<br>(0.48, 1.01)  |  | 1.05<br>(0.81, 1.35) |  | 0.60<br>(0.44, 0.81)   | 0.86<br>(0.62, 1.2)    |  | 1.37<br>(1.00, 1.87) | 1.36<br>(0.99, 1.87) |  | 0.91<br>(0.61, 1.36) |
|                 | P=0.002              | P=0.37               | P=0.06                |  | P=0.71               |  | P=0.001                | P=0.38                 |  | P=0.05               | P=0.06               |  | P=0.65               |
| Anosmia/ageusia | 0.18<br>(0.07, 0.43) | 0.74<br>(0.39, 1.42) | 0.48<br>(0.23, 1.005) |  | 1.5<br>(0.91, 2.46)  |  | 69.63<br>(9.5, 510.47) | 12.89<br>(1.66, 100.0) |  | 1.98<br>(1.04, 3.77) | 2.09<br>(1.08, 4.04) |  | 0.76<br>(0.31, 1.85) |
|                 | P<0.001              | P=0.37               | P=0.05                |  | P=0.11               |  | P<0.001                | P=0.02                 |  | P=0.04               | P=0.03               |  | P=0.54               |

Data are adjusted for age, sex, number of days of illness at ED presentation, and hospitalization status. Data are reported as odds ratios (95% CI).

a - Symptoms were grouped as follows: upper respiratory = rhinorrhea and/or sore throat, lower respiratory = shortness of breath, pleuritic or non-pleuritic chest pain, wheezing and/or sputum production, GI = abdominal pain, vomiting, diarrhea and/or anorexia, neurologic = headache and/or seizures, MSK= joint and/or muscle pain, dehydration = decreased urine output and/or refusal to drink, systemic = irritability, lethargy, apnea and/or drowsiness, rash/oral changes = rash to skin, hands, feet and/or oral or extremity changes.

**eTable 2.** Comparison of Symptom Profiles by Method of Variant of Concern Assignment (Reported vs Imputed)

|                                        | Original-type Imputed (n=409) | Original-type Reported (n=0) | P-value <sup>a</sup> | Alpha Imputed (n=84 <sup>c</sup> ) | Alpha Reported (n=158 <sup>d</sup> ) | P-value <sup>a</sup> | Delta Imputed (n=144) | Delta Reported (n=177) | P-value <sup>a</sup> | Omicron Imputed (n=422 <sup>e</sup> ) | Omicron Reported (n=46 <sup>e</sup> ) | P-value <sup>a</sup> |
|----------------------------------------|-------------------------------|------------------------------|----------------------|------------------------------------|--------------------------------------|----------------------|-----------------------|------------------------|----------------------|---------------------------------------|---------------------------------------|----------------------|
| <b>Age, years, median (IQR)</b>        | 1.3 (0.6, 6.0)                | N/A                          | N/A                  | 2.0 (1.0, 7.0)                     | 1.7 (0.8, 7.0)                       | 0.95                 | 2.0 (0.9, 7.0)        | 3.0 (0.8, 9.0)         | 0.67                 | 1.0 (0.3, 6.0)                        | 3.0 (1.0, 7.0)                        | 0.13                 |
| <b>Age groups</b>                      |                               | N/A                          | N/A                  |                                    |                                      | 0.93                 |                       |                        | 0.28                 |                                       |                                       | 0.13                 |
| < 1 year                               | 135 (33.0)                    |                              |                      | 18 (21.4)                          | 47 (29.7)                            |                      | 38 (26.4)             | 49 (27.7)              |                      | 190 (45.0)                            | 10 (21.7)                             |                      |
| 1 to 3 years                           | 133 (32.5)                    |                              |                      | 33 (39.3)                          | 55 (34.8)                            |                      | 50 (34.7)             | 43 (24.3)              |                      | 97 (23.0)                             | 15 (32.6)                             |                      |
| ≥ 4 years                              | 141 (34.5)                    |                              |                      | 33 (39.3)                          | 56 (35.4)                            |                      | 56 (38.9)             | 85 (48.0)              |                      | 135 (32.0)                            | 21 (45.7)                             |                      |
| <b>Sex, male, n (%)</b>                | 227 (55.5)                    | N/A                          | N/A                  | 51 (60.7)                          | 97 (61.4)                            | 0.99                 | 80 (55.6)             | 96 (54.2)              | 0.94                 | 221 (52.4)                            | 29 (63.0)                             | 0.47                 |
| <b>Days of illness, median (IQR)</b>   | 2.0 (1.0, 4.0)                | N/A                          | N/A                  | 2.0 (1.0, 5.0)                     | 2.0 (0.5, 4.0)                       | 0.55                 | 4.0 (2.0, 6.0)        | 3.0 (1.5, 5.0)         | 0.03                 | 3.0 (1.0, 4.0)                        | 2.0 (0.5, 3.0)                        | 0.27                 |
| <b>Days of illness</b>                 |                               | N/A                          | N/A                  |                                    |                                      | 0.93                 |                       |                        | 0.12                 |                                       |                                       | 0.37                 |
| ≤1 day                                 | 158 (38.6)                    |                              |                      | 31 (37.3)                          | 69 (44.8)                            |                      | 24 (16.7)             | 44 (24.9)              |                      | 126 (29.9)                            | 21 (45.7)                             |                      |
| 2 to 3 days                            | 130 (31.8)                    |                              |                      | 23 (27.7)                          | 44 (28.6)                            |                      | 39 (27.1)             | 62 (35.0)              |                      | 158 (37.4)                            | 15 (32.6)                             |                      |
| ≥ 4 days                               | 121 (29.6)                    |                              |                      | 29 (34.9)                          | 41 (26.6)                            |                      | 81 (56.3)             | 71 (40.1)              |                      | 138 (32.7)                            | 10 (21.7)                             |                      |
| <b>Core COVID Symptoms<sup>b</sup></b> | 55 (13.4)                     | N/A                          | N/A                  | 68 (81.9)                          | 127 (82.5)                           | 0.99                 | 130 (90.3)            | 164 (92.7)             | 0.71                 | 390 (92.4)                            | 44 (95.7)                             | 0.77                 |
| Fever                                  | 290 (70.9)                    | N/A                          | N/A                  | 50 (60.2)                          | 106 (68.8)                           | 0.93                 | 106 (73.6)            | 146 (82.5)             | 0.20                 | 341 (80.8)                            | 38 (82.6)                             | 0.94                 |

|                                   |                   |     |     |              |              |          |               |               |          |               |              |      |
|-----------------------------------|-------------------|-----|-----|--------------|--------------|----------|---------------|---------------|----------|---------------|--------------|------|
| Cough                             | 211<br>(51.6)     | N/A | N/A | 43<br>(51.8) | 86<br>(55.8) | 0.9<br>8 | 90<br>(62.5)  | 107<br>(60.5) | 0.9<br>2 | 245<br>(58.2) | 29<br>(64.4) | 0.77 |
| Conjunctivitis                    | 31 (7.6)          | N/A | N/A | 2 (2.4)      | 5 (3.2)      | 0.9<br>9 | 9 (6.3)       | 23<br>(13)    | 0.2<br>1 | 17 (4.0)      | 1<br>(2.2)   | 0.99 |
| <b>Upper Respiratory Symptoms</b> | 241<br>(58.9)     | N/A | N/A | 42<br>(50.6) | 77 (50)      | 0.9<br>9 | 101<br>(70.1) | 127<br>(71.8) | 0.9<br>4 | 259<br>(61.5) | 29<br>(64.4) | 0.89 |
| Rhinorrhea                        | 215/408<br>(52.7) | N/A | N/A | 36<br>(43.4) | 65<br>(42.2) | 0.9<br>9 | 89<br>(61.8)  | 109<br>(61.6) | 0.9<br>9 | 234<br>(55.6) | 22<br>(48.9) | 0.77 |
| Sore throat                       | 76<br>(18.6)      | N/A | N/A | 14<br>(16.9) | 24<br>(15.6) | 0.9<br>9 | 33<br>(22.9)  | 58<br>(32.8)  | 0.2<br>0 | 92<br>(21.9)  | 18<br>(40.0) | 0.13 |
| <b>Lower Respiratory Symptoms</b> | 145<br>(35.5)     | N/A | N/A | 33<br>(39.8) | 52<br>(33.8) | 0.9<br>3 | 45<br>(31.3)  | 67<br>(37.9)  | 0.4<br>5 | 177<br>(42)   | 26<br>(57.8) | 0.30 |
| Shortness of breath               | 88<br>(21.5)      | N/A | N/A | 23<br>(27.7) | 30<br>(19.5) | 0.9<br>3 | 24<br>(16.7)  | 44<br>(24.9)  | 0.2<br>4 | 131<br>(31.1) | 23<br>(51.1) | 0.13 |
| Chest pain                        | 38 (9.3)          | N/A | N/A | 8 (9.6)      | 11 (7.1)     | 0.9<br>6 | 10 (6.9)      | 13<br>(7.3)   | 0.9<br>9 | 22 (5.2)      | 2<br>(4.4)   | 0.99 |
| Chest pain (pleuritic)            | 14 (3.4)          | N/A | N/A | 3 (3.6)      | 3 (1.9)      | 0.9<br>3 | 2 (1.4)       | 4 (2.3)       | 0.9<br>2 | 12 (2.9)      | 2<br>(4.4)   | 0.83 |
| Wheezing                          | 55<br>(13.4)      | N/A | N/A | 15<br>(18.1) | 14 (9.1)     | 0.5<br>5 | 24<br>(16.7)  | 20<br>(11.3)  | 0.3<br>8 | 70<br>(16.6)  | 9<br>(20)    | 0.82 |
| Sputum                            | 38 (9.3)          | N/A | N/A | 7 (8.4)      | 15 (9.7)     | 0.9<br>9 | 20<br>(13.9)  | 20<br>(11.3)  | 0.7<br>5 | 57<br>(13.5)  | 4<br>(8.9)   | 0.77 |
| <b>GI</b>                         | 272<br>(66.5)     | N/A | N/A | 56<br>(67.5) | 90<br>(58.4) | 0.9<br>3 | 94<br>(65.3)  | 107<br>(60.5) | 0.6<br>4 | 254<br>(60.3) | 33<br>(73.3) | 0.39 |
| Abdominal pain                    | 109<br>(26.7)     | N/A | N/A | 21<br>(25.3) | 29<br>(18.8) | 0.9<br>3 | 27<br>(18.8)  | 35<br>(19.8)  | 0.9<br>4 | 81<br>(19.2)  | 11<br>(24.4) | 0.77 |
| Vomiting                          | 114<br>(27.9)     | N/A | N/A | 28<br>(33.7) | 34<br>(22.1) | 0.5<br>5 | 38<br>(26.4)  | 42<br>(23.7)  | 0.8<br>5 | 110<br>(26.1) | 11<br>(24.4) | 0.97 |
| Diarrhea                          | 107<br>(26.2)     | N/A | N/A | 21<br>(25.3) | 27<br>(17.5) | 0.9<br>3 | 30<br>(20.8)  | 33<br>(18.6)  | 0.8<br>7 | 86<br>(20.4)  | 6<br>(13.3)  | 0.72 |
| Anorexia                          | 155<br>(37.9)     | N/A | N/A | 37<br>(44.6) | 58<br>(37.7) | 0.9<br>3 | 59 (41)       | 71<br>(40.1)  | 0.9<br>8 | 148<br>(35.2) | 22<br>(48.9) | 0.37 |
| <b>Neurologic</b>                 | 100<br>(24.4)     | N/A | N/A | 19<br>(22.9) | 39<br>(25.3) | 0.9<br>9 | 34<br>(23.6)  | 65<br>(36.7)  | 0.1<br>1 | 91<br>(21.6)  | 15<br>(33.3) | 0.37 |
| Headache                          | 93<br>(22.7)      | N/A | N/A | 17<br>(20.5) | 36<br>(23.4) | 0.9<br>9 | 31<br>(21.5)  | 58<br>(32.8)  | 0.1<br>7 | 86<br>(20.4)  | 12<br>(26.7) | 0.72 |

|                             |            |     |     |           |           |      |             |               |      |                |           |      |
|-----------------------------|------------|-----|-----|-----------|-----------|------|-------------|---------------|------|----------------|-----------|------|
| Seizures                    | 10 (2.4)   | N/A | N/A | 3 (3.6)   | 3 (1.9)   | 0.93 | 4 (2.8)     | 8 (4.5)       | 0.84 | 10 (2.4)       | 3 (6.7)   | 0.42 |
| <b>MSK</b>                  | 83 (20.3)  | N/A | N/A | 12 (14.5) | 21 (13.6) | 0.99 | 16 (11.1)   | 39 (22.0)     | 0.11 | 48 (11.4)      | 7 (15.6)  | 0.77 |
| Muscle pain                 | 80 (19.6)  | N/A | N/A | 12 (14.5) | 21 (13.6) | 0.99 | 15 (10.4)   | 34 (19.2)     | 0.18 | 43 (10.2)      | 6 (13.3)  | 0.77 |
| Joint pain                  | 50 (12.2)  | N/A | N/A | 6 (7.2)   | 16 (10.4) | 0.93 | 13 (9.0)    | 29 (16.4)     | 0.20 | 29 (6.9)       | 6 (13.3)  | 0.42 |
| <b>Rash or oral changes</b> | 105 (25.7) | N/A | N/A | 13 (15.7) | 30 (19.5) | 0.95 | 20 (13.9)   | 38 (21.5)     | 0.24 | 76 (18.1)      | 8 (17.8)  | 0.99 |
| Skin rash                   | 52 (12.7)  | N/A | N/A | 6 (7.2)   | 19 (12.3) | 0.93 | 12 (8.3)    | 16 (9.0)      | 0.94 | 33 (7.8)       | 6 (13.3)  | 0.63 |
| Rash to hands               | 10 (2.4)   | N/A | N/A | 2 (2.4)   | 2 (1.3)   | 0.99 | 2 (1.4)     | 2 (1.1)       | 0.99 | 8 (1.9)        | 1 (2.2)   | 0.99 |
| Rash to feet                | 14 (3.4)   | N/A | N/A | 3 (3.6)   | 6 (3.9)   | 0.99 | 1/143 (0.7) | 3 (1.7)       | 0.87 | 6 (1.4)        | 1 (2.2)   | 0.77 |
| Extremity changes           | 8 (2.0)    | N/A | N/A | 1 (1.2)   | 3 (1.9)   | 0.99 | 2 (1.4)     | 3 (1.7)       | 0.99 | 9 (2.1)        | 0 (0)     | 0.99 |
| Oral changes                | 56 (13.7)  | N/A | N/A | 5 (6.0)   | 7 (4.5)   | 0.99 | 8 (5.6)     | 21 (11.9)     | 0.20 | 43 (10.2)      | 4 (8.9)   | 0.99 |
| <b>Dehydration</b>          | 126 (30.8) | N/A | N/A | 28 (33.7) | 48 (31.2) | 0.99 | 47 (32.6)   | 48 (27.1)     | 0.54 | 142 (33.7)     | 13 (28.9) | 0.77 |
| Decreased urine output      | 69 (16.9)  | N/A | N/A | 15 (18.1) | 23 (14.9) | 0.98 | 32 (22.2)   | 29 (16.4)     | 0.40 | 60 (14.3)      | 9 (20.0)  | 0.67 |
| Refusal to drink            | 102 (24.9) | N/A | N/A | 25 (30.1) | 39 (25.3) | 0.93 | 37 (25.7)   | 37 (20.9)     | 0.55 | 127 (30.2)     | 12 (26.7) | 0.83 |
| <b>Systemic</b>             | 273 (66.7) | N/A | N/A | 40 (48.2) | 96 (62.3) | 0.55 | 82 (56.9)   | 117 (66.1)    | 0.26 | 295 (70.1)     | 34 (75.6) | 0.77 |
| Apnea                       | 4 (1.0)    | N/A | N/A | 1 (1.2)   | 3 (1.9)   | 0.99 | 0 (0)       | 4 (2.3)       | 0.33 | 4 (1.0)        | 0 (0)     | 0.99 |
| Irritable                   | 194 (47.4) | N/A | N/A | 21 (25.3) | 76 (49.4) | 0.02 | 58 (40.3)   | 68/176 (38.6) | 0.94 | 186 (44.2)     | 27 (60.0) | 0.30 |
| Lethargic                   | 174 (42.5) | N/A | N/A | 29 (34.9) | 57 (37.0) | 0.99 | 54 (37.5)   | 66 (37.3)     | 0.99 | 194/420 (46.2) | 19 (42.2) | 0.83 |
| Drowsy                      | 147 (35.9) | N/A | N/A | 28 (33.7) | 49 (31.8) | 0.99 | 49 (34.0)   | 70/176 (39.8) | 0.54 | 193 (45.8)     | 19 (42.2) | 0.83 |
| <b>Loss of</b>              | 35 (8.6)   | N/A | N/A | 6 (7.2)   | 6 (3.9)   | 0.93 | 5 (3.5)     | 20 (11.3)     | 0.11 | 5 (1.2)        | 2 (4.4)   | 0.42 |

|                                                        |                |     |     |                |                |      |                |                |      |                |                |      |
|--------------------------------------------------------|----------------|-----|-----|----------------|----------------|------|----------------|----------------|------|----------------|----------------|------|
| <b>smell/taste</b>                                     |                |     |     |                |                |      |                |                |      |                |                |      |
| Loss of smell                                          | 21 (5.1)       | N/A | N/A | 4 (4.8)        | 3 (1.9)        | 0.93 | 1 (0.7)        | 13 (7.3)       | 0.10 | 3 (0.7)        | 0 (0)          | 0.99 |
| Loss of taste                                          | 30 (7.3)       | N/A | N/A | 6 (7.2)        | 5 (3.2)        | 0.93 | 5 (3.5)        | 17 (9.6)       | 0.20 | 4 (1.0)        | 2 (4.4)        | 0.42 |
| <b>Number of symptoms at index visit, median (IQR)</b> | 6.0 (4.0, 9.0) | N/A | N/A | 5.0 (3.0, 8.0) | 5.0 (3.0, 8.3) | 0.99 | 6.0 (3.0, 9.0) | 7.0 (3.0, 9.0) | 0.38 | 6.0 (3.0, 9.0) | 7.0 (4.0, 9.3) | N/A  |
| <b>Number of symptoms at index visit</b>               |                |     | N/A |                |                | 0.99 |                |                | 0.52 |                |                | 0.63 |
| ≤ 3                                                    | 88 (21.5)      | N/A |     | 31 (37.3)      | 54 (35.1)      |      | 39 (27.1)      | 45 (25.4)      |      | 112 (26.5)     | 9 (19.6)       |      |
| 4 to 6                                                 | 140 (34.2)     | N/A |     | 24 (28.9)      | 43 (27.9)      |      | 44 (30.6)      | 42 (23.7)      |      | 126 (29.9)     | 11 (23.9)      |      |
| ≥ 7                                                    | 181 (44.3)     | N/A |     | 28 (33.7)      | 57 (37)        |      | 61 (42.4)      | 90 (50.8)      |      | 184 (43.6)     | 26 (56.5)      |      |

All data are n(%) unless otherwise indicated.

a Adjusted P-value for multiple comparisons via Benjamini-Hochberg method, within the set of tests

b  $\geq 1$  of fever, cough, and/or loss of smell or taste

c missing data in one patient

d missing data in four patients

e missing data in one patient

**eTable 3.** Comparison of Clinical Course and Outcomes at Index ED Visit or Within 14-Day Follow-up Period, by Method of Variant of Concern Assignment (Reported vs Imputed)

|                                           | Original-type Imputed (n=389) | Original-type Reported (n=31) | P-value <sup>b</sup> | Alpha Imputed (n=54) | Alpha Reported (n=170) | P-value <sup>b</sup> | Delta Imputed (n=128) | Delta Reported (n=205) | P-value <sup>b</sup> | Omicron Imputed (n=430) | Omicron Reported (n=62) | P-value <sup>b</sup> |
|-------------------------------------------|-------------------------------|-------------------------------|----------------------|----------------------|------------------------|----------------------|-----------------------|------------------------|----------------------|-------------------------|-------------------------|----------------------|
| <b>OUTCOMES</b>                           |                               |                               |                      |                      |                        |                      |                       |                        |                      |                         |                         |                      |
| <b>Admitted</b>                           | N/A                           | N/A                           | 10/84 (11.9)         | 8/158 (5.1)          | 0.18                   | 18/144 (12.5)        | 15/177 (8.5)          | 0.59                   | 51/422 (12.1)        | 10/46 (21.7)            | 0.36                    | N/A                  |
| <b>Admitted to ICU</b>                    | N/A                           | N/A                           | 1/84 (1.2)           | 2/158 (1.3)          | 0.99                   | 0/144 (0)            | 2/177 (1.1)           | 0.67                   | 1/422 (0.2)          | 0/46 (0)                | 0.99                    | N/A                  |
| <b>Any Revisit</b>                        | N/A                           | N/A                           | 18/76 (23.7)         | 50/138 (36.2)        | 0.18                   | 36/118 (30.5)        | 36/149 (24.2)         | 0.59                   | 107/364 (29.4)       | 9/33 (27.3)             | 0.99                    | N/A                  |
| <b>Revisit to ED</b>                      | N/A                           | N/A                           | 10/76 (13.2)         | 27/138 (19.6)        | 0.47                   | 12/118 (10.2)        | 15/149 (10.1)         | 0.98                   | 68/364 (18.7)        | 7/33 (21.2)             | 0.99                    | N/A                  |
| <b>Hospitalized at revisit</b>            | N/A                           | N/A                           | 1/84 (1.2)           | 2/158 (1.3)          | 0.99                   | 1/144 (0.7)          | 4/177 (2.3)           | 0.67                   | 7/422 (1.7)          | 2/46 (4.3)              | 0.66                    | N/A                  |
| <b>Mechanical ventilation<sup>a</sup></b> | N/A                           | N/A                           | 0/84 (0)             | 1/158 (0.6)          | 0.99                   | 0/144 (0)            | 2/175 (1.1)           | 0.67                   | 2/416 (0.5)          | 0/46 (0)                | 0.99                    | N/A                  |
| <b>Died</b>                               | N/A                           | N/A                           | 0/84 (0)             | 0/158 (0)            | N/A                    | 0/144 (0)            | 0/175 (0)             | N/A                    | 0/419 (0)            | 0/46 (0)                | N/A                     | N/A                  |
| <b>Chest x-ray/MANAGEMENT</b>             |                               |                               |                      |                      |                        |                      |                       |                        |                      |                         |                         |                      |
| <b>Chest x-ray</b>                        | 69/407 (17.0)                 | N/A                           | N/A                  | 13/84 (15.5)         | 14/158 (8.9)           | 0.29                 | 21/142 (14.8)         | 14/175 (8.0)           | 0.56                 | 89/421 (21.1)           | 8/46 (17.4)             | 0.99                 |
| <b>IV fluid</b>                           | 50/406 (12.3)                 | N/A                           | N/A                  | 9/84 (10.7)          | 5/158 (3.2)            | 0.13                 | 15/142 (10.6)         | 16/177 (9.0)           | 0.77                 | 60/417 (14.4)           | 11/46 (23.9)            | 0.36                 |
| <b>Oxygen</b>                             | 5/406 (1.2)                   | N/A                           | N/A                  | 0/84 (0)             | 1/158 (0.6)            | 0.99                 | 4/143 (2.8)           | 3/175 (1.7)            | 0.77                 | 8/416 (1.9)             | 1/46 (2.2)              | 0.99                 |
| <b>Antibiotics</b>                        | 62/406                        | N/A                           | N/A                  | 16/84 (19)           | 11/158 (7.0)           | 0.05                 | 27/143 (18.9)         | 27/176 (15.3)          | 0.67                 | 64/420 (15.2)           | 6/46 (13.0)             | 0.99                 |



|                                        |                 |     |     |                 |                |          |                  |                 |          |                  |                 |          |
|----------------------------------------|-----------------|-----|-----|-----------------|----------------|----------|------------------|-----------------|----------|------------------|-----------------|----------|
|                                        | (15.3)          |     |     |                 |                |          |                  |                 |          |                  |                 |          |
| <b>Corticosteroids</b>                 | 38/405<br>(9.4) | N/A | N/A | 10/84<br>(11.9) | 19/158<br>(12) | 0.9<br>9 | 17/143<br>(11.9) | 14/175<br>(8.0) | 0.5<br>9 | 69/418<br>(16.5) | 13/46<br>(28.3) | 0.3<br>6 |
| Co-detection of a respiratory pathogen | 2/63<br>(3.2)   | N/A | N/A | 1/14<br>(7.1)   | 2/16<br>(12.5) | 0.9<br>9 | 9/16<br>(56.3)   | 5/19<br>(26.3)  | 0.5<br>6 | 16/94<br>(17)    | 0/10<br>(0)     | 0.8<br>5 |

All data are n (%).

ED, emergency department; ICU, intensive care unit; IV, intravenous

a Invasive or non-invasive

b Adjusted P-value for multiple comparisons via Benjamini-Hochberg method, within the set of tests

**eFigure.** Chronological Depiction of Timing of Identification of Variants and Proportional Breakdown of Identification Through Testing or Imputation Based on Known Dominant Strains

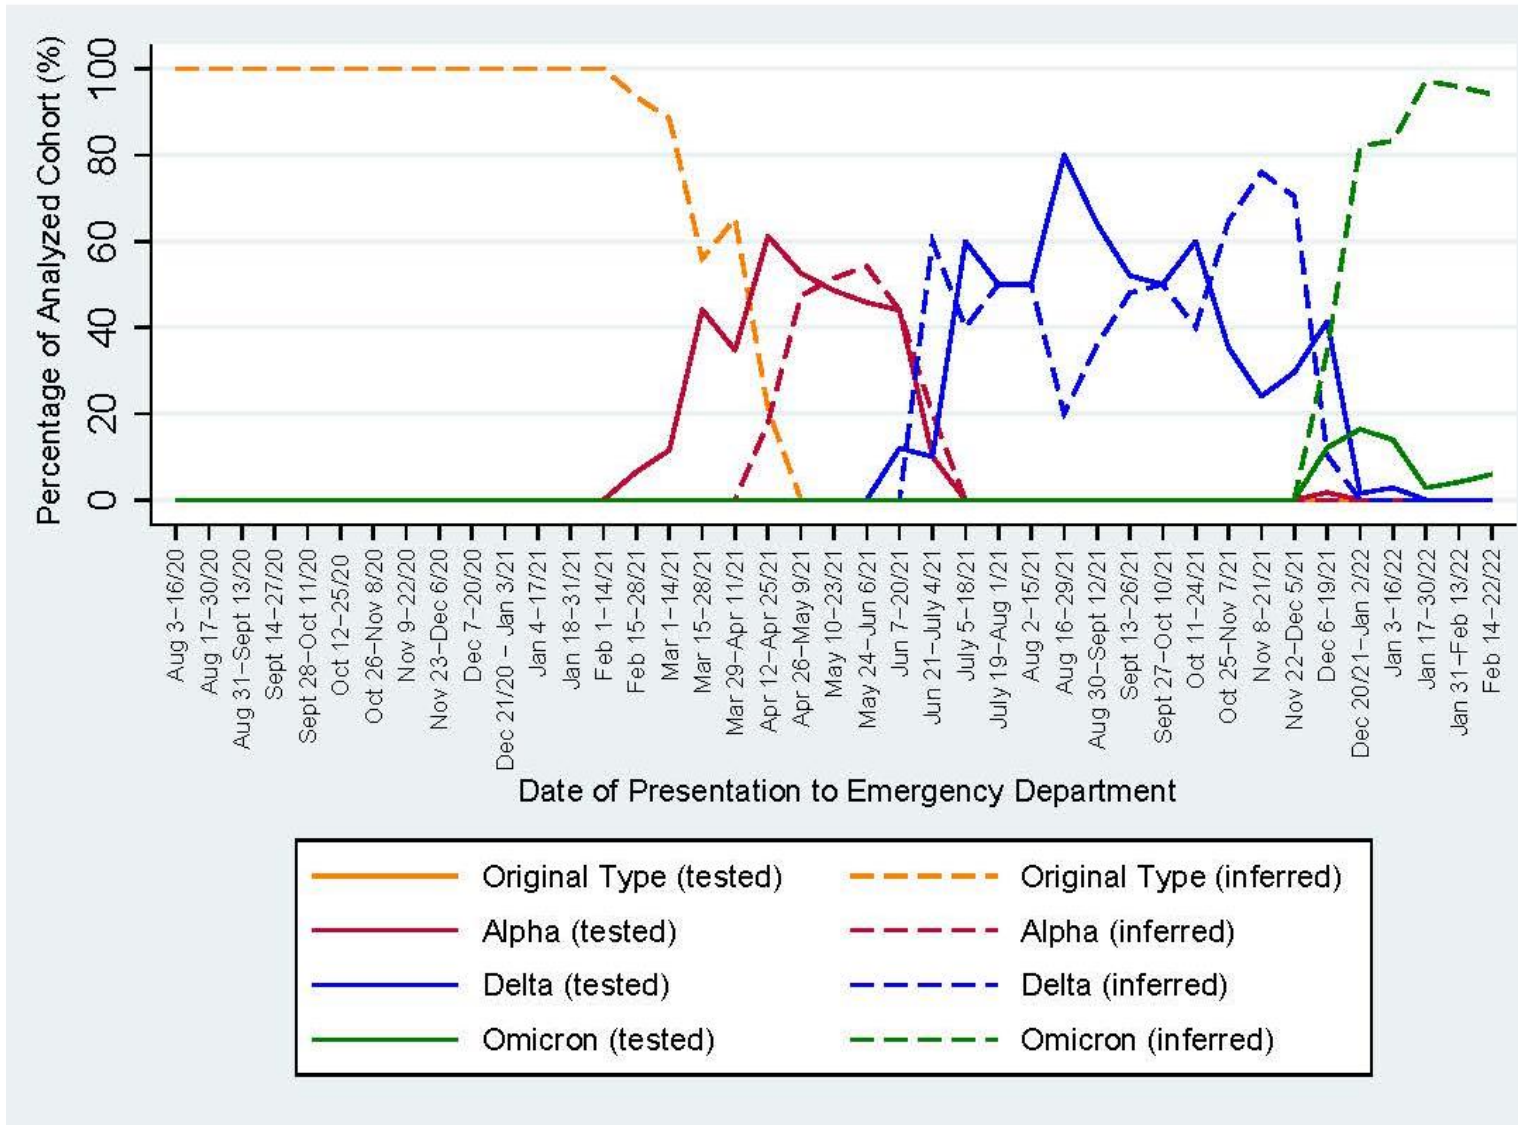

Supplement: jamanetwopen-e232328-s001.pdf [file jamanetwopen-e232328-s001.pdf]
