# Supplementary material for: Comparison of Symptoms Associated With SARS-CoV-2 Variants Among Children in Canada
Source: PubMed Central journal article supplement (PMC9999248; doi:10.1001/jamanetworkopen.2023.2328), 2023-03-09
Supplement: jamanetwopen-e232328-s002.pdf [file jamanetwopen-e232328-s002.pdf]

\*First name, last name, and suffix (if applicable) are required and will appear in PubMed.

| <b>*Group Name(s): Pediatric Emergency Research Canada (PERC) COVID Study Group</b> |                   |                              |                  |                       |                                          |                                                         |                                                                                            |
|-------------------------------------------------------------------------------------|-------------------|------------------------------|------------------|-----------------------|------------------------------------------|---------------------------------------------------------|--------------------------------------------------------------------------------------------|
| <b>*First Name and Middle Initial(s)</b>                                            | <b>*Last Name</b> | <b>*Suffix (eg, Jr, III)</b> | Academic Degrees | Institution           | Location (city, state/province, country) | Role or Contribution, eg, chair, principal investigator | Group (if more than 1 Group listed in the byline) and/or Subgroup (eg, Steering Committee) |
| Samina                                                                              | Ali               |                              | MDCM             | University of Alberta | Edmonton, AB, Canada                     | Study Oversight                                         |                                                                                            |
| Mandi                                                                               | Newton            |                              | PhD              | University of Alberta | Edmonton, AB, Canada                     | Study Oversight                                         |                                                                                            |
| Waleed                                                                              | Alqurashi         |                              | MD               | University of Ottawa  | Ottawa, ON, Canada                       | Study Oversight                                         |                                                                                            |
| Melissa                                                                             | Lorenzo           |                              | MD               | University of Toronto | Toronto, ON, Canada                      | Study Oversight                                         |                                                                                            |
| Tyrus                                                                               | Crawford          |                              | B.Soc.Sci        | University of Ottawa  | Ottawa, ON, Canada                       | Database Management                                     |                                                                                            |
| Becky                                                                               | Emerton           |                              | BSc              | University of Calgary | Calgary, AB, Canada                      | Study Administration                                    |                                                                                            |
