# Supplementary material for: Comparison of Symptoms Associated With SARS-CoV-2 Variants Among Children in Canada
Source: PubMed Central journal article supplement (PMC9999248; doi:10.1001/jamanetworkopen.2023.2328), 2023-03-09
Supplement: jamanetwopen-e232328-s003.pdf [file jamanetwopen-e232328-s003.pdf]

## Data Sharing Statement

Sumner. Comparison of Symptoms Associated With SARS-CoV-2 Variants Among Children in Canada. *JAMA Netw Open*. Published March 09, 2023.

doi:10.1001/jamanetworkopen.2023.2328

### Data

**Data available:** Yes

**Data types:** Deidentified participant data

**How to access data:** Data will be made available upon reasonable request and with appropriate ethics approvals and data sharing mechanisms in place.

**When available:** With publication

### Supporting Documents

**Document types:** None

### Additional Information

**Who can access the data:** Data will only be made available to researchers whose proposed use of the data has been approved.

**Types of analyses:** All data access requests will require specific research hypotheses or planned analyses.

**Mechanisms of data availability:** Data will be made available by the investigator after ethics approval has been obtained and signed data access agreements have been executed.
